# Supplementary material
Source: PubMed Central journal article supplement (PMC3568365)
Supplement: 1217781110_pnas.201217781SI.pdf [file 1217781110_pnas.201217781SI.pdf]

# Supporting Information

Liu et al. 10.1073/pnas.1217781110

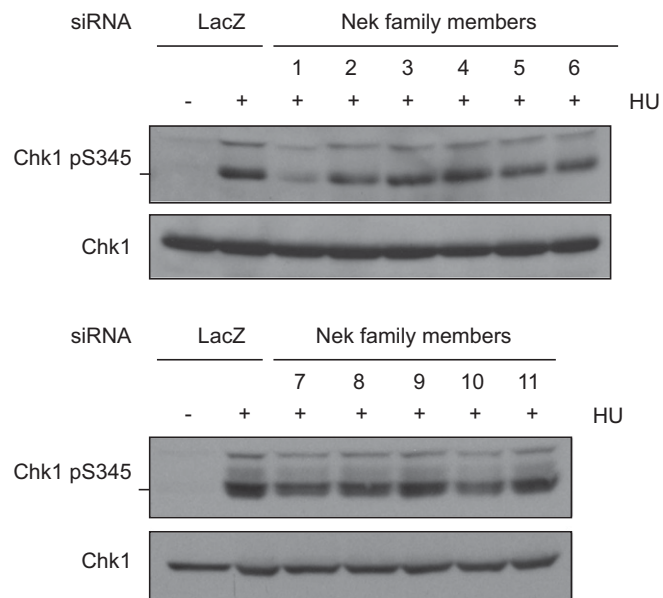

**Fig. S1.** Nek1 is required for HU-induced Chk1 phosphorylation. HCT116 cells were transfected with siRNAs targeting each of the 11 human Nek kinases. Transfected cells were treated with 1 mM HU for 2 h, and Chk1 phosphorylation was analyzed with phospho-specific antibody.

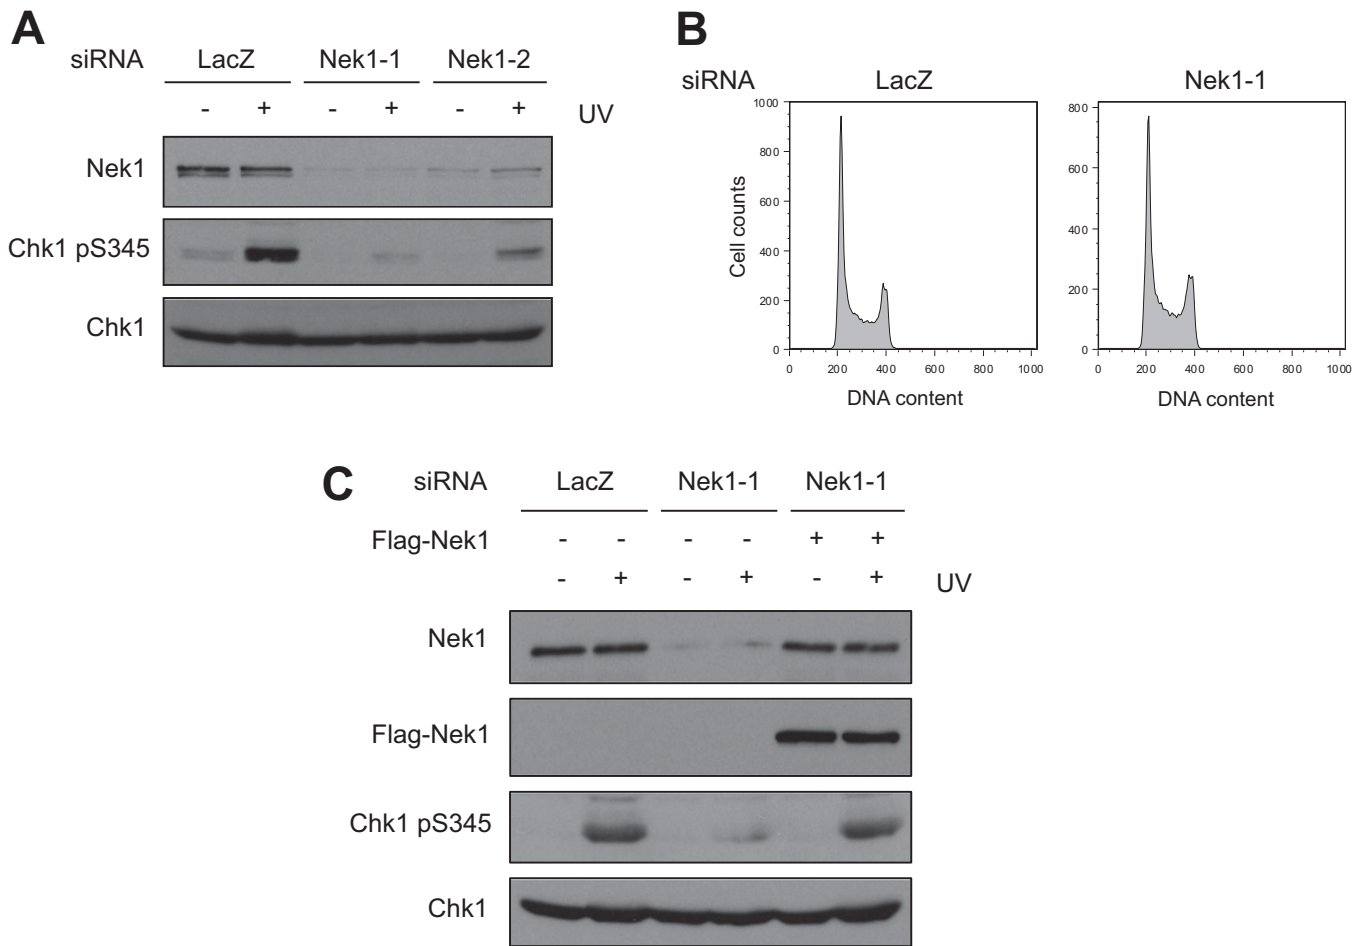

**Fig. S2.** Nek1 is required for UV-induced Chk1 phosphorylation. (A) HCT116 cells were transfected with LacZ, Nek1-1, or Nek1-2 siRNA. Transfected cells were irradiated with UV (15 J/m<sup>2</sup>), and Chk1 phosphorylation was analyzed 2 h after UV treatment. Knockdown of endogenous Nek1 was confirmed with Nek1 antibody. (B) HCT116 cells were transfected with LacZ or Nek1-1 siRNA as in A. Transfected cells were subsequently fixed, stained with propidium iodide, and analyzed by FACS. (C) HCT116 cells were first transfected with LacZ or Nek1-1 siRNA, and then transfected again with empty vectors or plasmids expressing siRNA-resistant Flag-Nek1. UV-induced Chk1 phosphorylation was analyzed as in A.

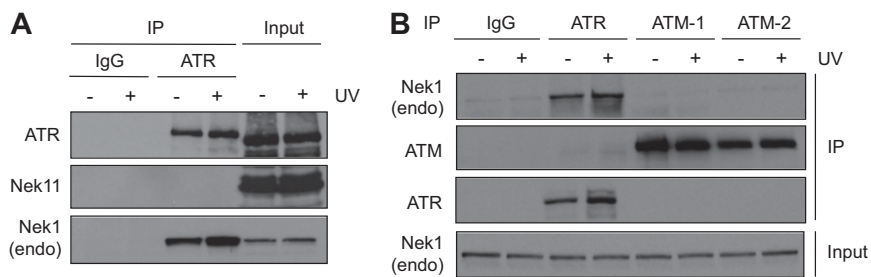

**Fig. S3.** Nek1 interacts with ATR–ATRIP specifically. (A) HCT116 cells were irradiated with UV or left untreated. Immunoprecipitates of ATRIP antibody or control antibody (IgG) were analyzed by Western blot using the indicated antibodies. (B) Cells were treated with UV or untreated as in A. Immunoprecipitates of ATR and ATM antibodies were analyzed by Western blot using the indicated antibodies.



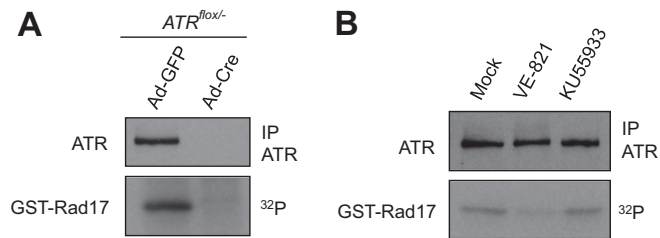

**Fig. 56.** Analysis of ATR kinase activity. (A) HCT116-derived *ATR<sup>flox/-</sup>* cells were infected with adenovirus expressing the Cre recombinase (Ad-Cre), or with control adenovirus expressing GFP (Ad-GFP). Endogenous ATR was immunoprecipitated from cell extracts. The levels of ATR in immunoprecipitates were analyzed by Western blot, and their ability to phosphorylate GST-Rad17 was analyzed using in vitro kinase assays. (B) HCT116 cells were treated with VE-821 (10  $\mu$ M), KU55933 (10  $\mu$ M), or DMSO before irradiated with UV. Endogenous ATR was immunoprecipitated from cell extracts, treated with the indicated inhibitors again, and tested with in vitro kinase assays using GST-Rad17 as substrate.
